# Supplementary material for: Co-Infection of Pseudomonas aeruginosa and Acanthamoeba spp. Isolated from Dust in Eastern Thailand: Public Health Implications
Source: Preprints.org preprint supplement (doi:10.20944/preprints202411.0071.v1), 2024-11-01
Supplement: Supplementary file 1 [file supplementary]

Table 1. Summary of environmental conditions measured in eastern Thailand during the study period.

| **Category** | **Minimum** | **Maximum** | **Average** |
| --- | --- | --- | --- |
| Temperature (°C) | 29 | 37 | 34 |
| Humidity (%RH | 29 | 100 | 63.57 |
| Wind speed (Km/h) | 9.3 | 18.1 | 13.23 |
| PM 2.5 (µg/m3) | 21.1 | 56.3 | 35.09 |
| PM 10 (µg/m3) | 35 | 103 | 39.29 |

Table 2. Statistical analysis of environmental factors associated with co-infection rates.

| **Category** | χ² | ***p*-value** |
| --- | --- | --- |
| Temperature (°C) | 7.79 | 0.02 |
| Humidity (%RH) | 4.96 | 0.08 |
| PM 2.5 (µg/m3) | 1.01 | 0.60 |
| PM 10 (µg/m3) | 2.40 | 0.30 |
